# Supplementary figures and images for: Feedback inhibition and its control in an insect olfactory circuit
Source: eLife journal article supplement (doi:10.7554/elife.53281), 2020-03-12

**Figure 2 - figure supplement 1**

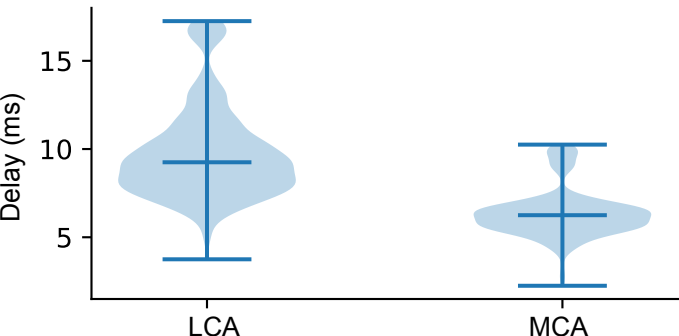

Supplement: supp [file elife_poa_e53281_Figure_2_figure_supplement_1.pdf › elife_poa_e53281_Figure_2_figure_supplement_1.pdf]

Figure 2 - figure supplement 2

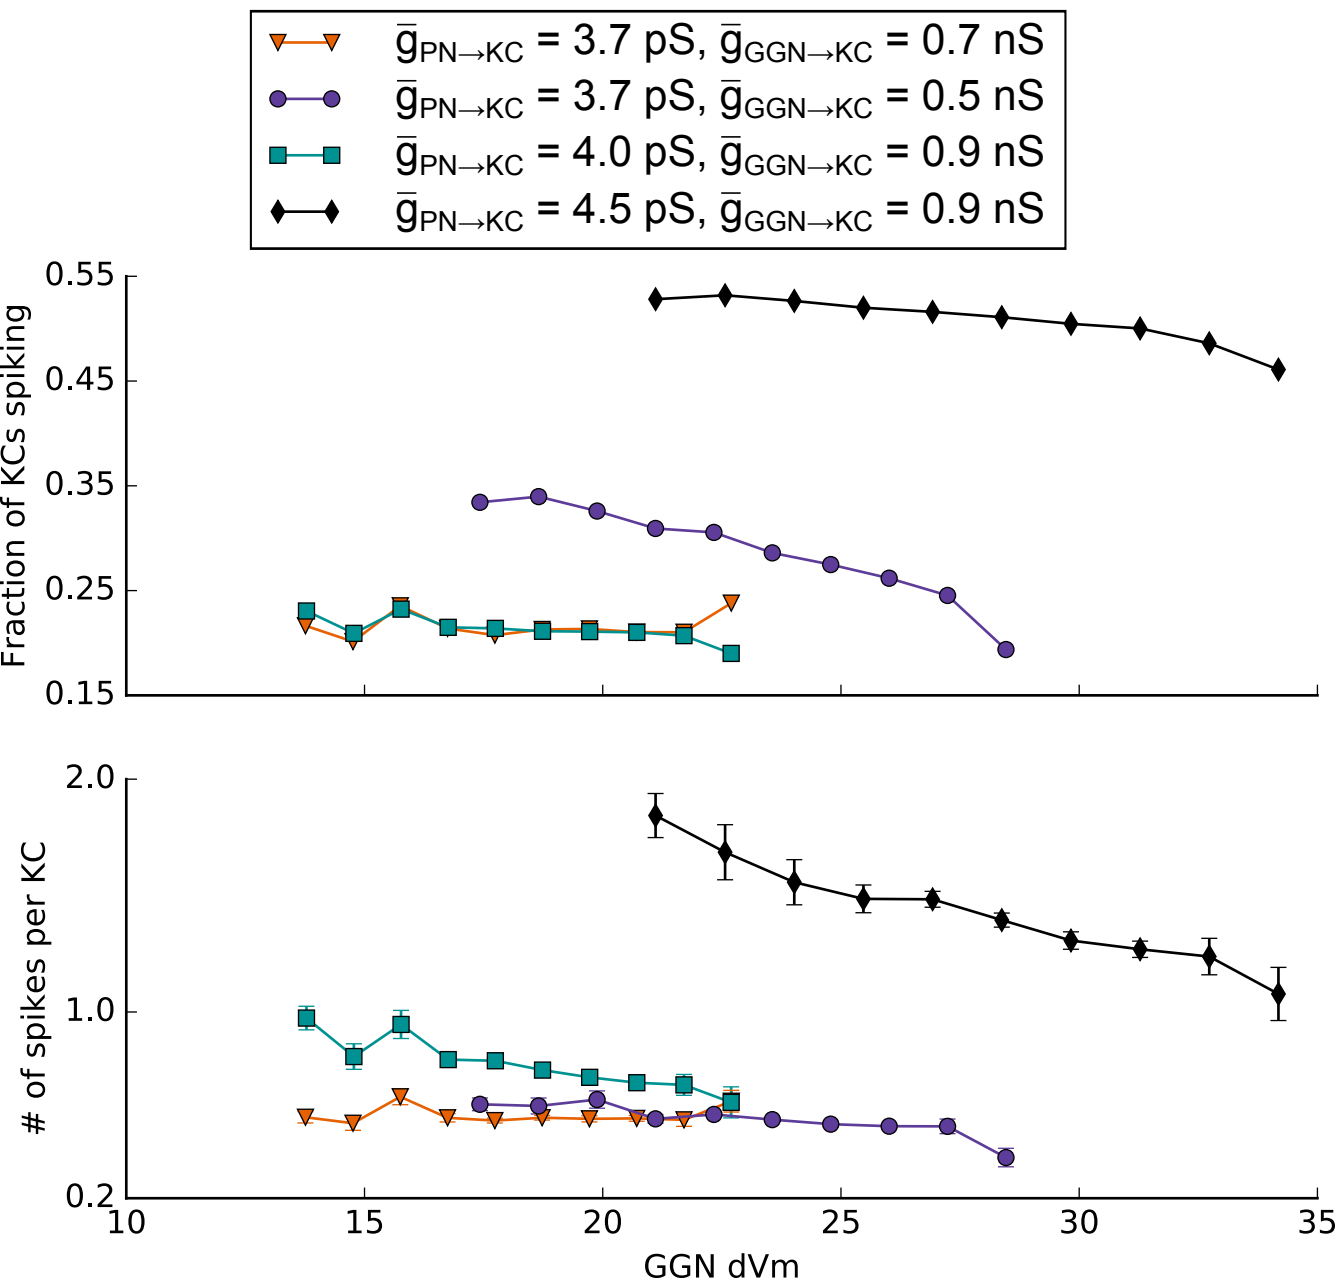

Supplement: supp [file elife_poa_e53281_Figure_2_figure_supplement_2.pdf › elife_poa_e53281_Figure_2_figure_supplement_2.pdf]

Figure 2 - figure supplement 3

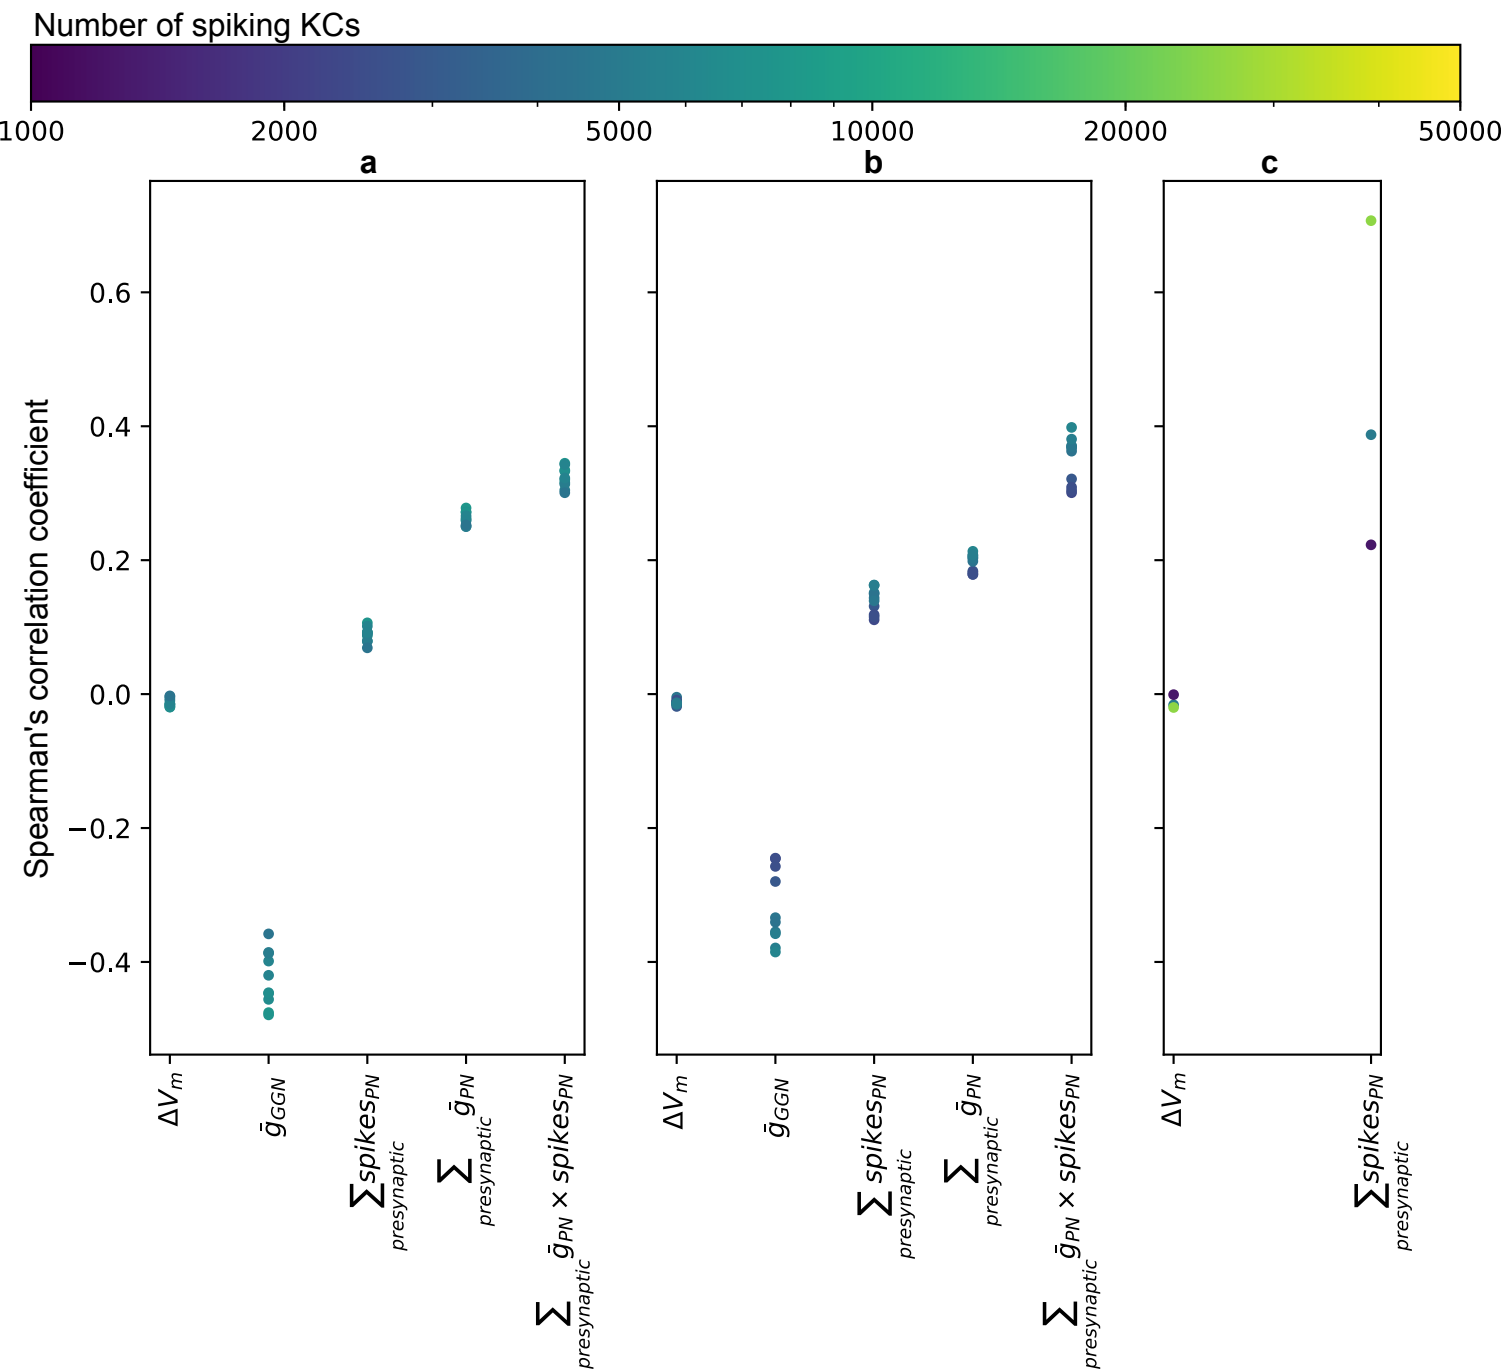

Supplement: supp [file elife_poa_e53281_Figure_2_figure_supplement_3.pdf › elife_poa_e53281_Figure_2_figure_supplement_3.pdf]

**Figure 3 - figure supplement 1**

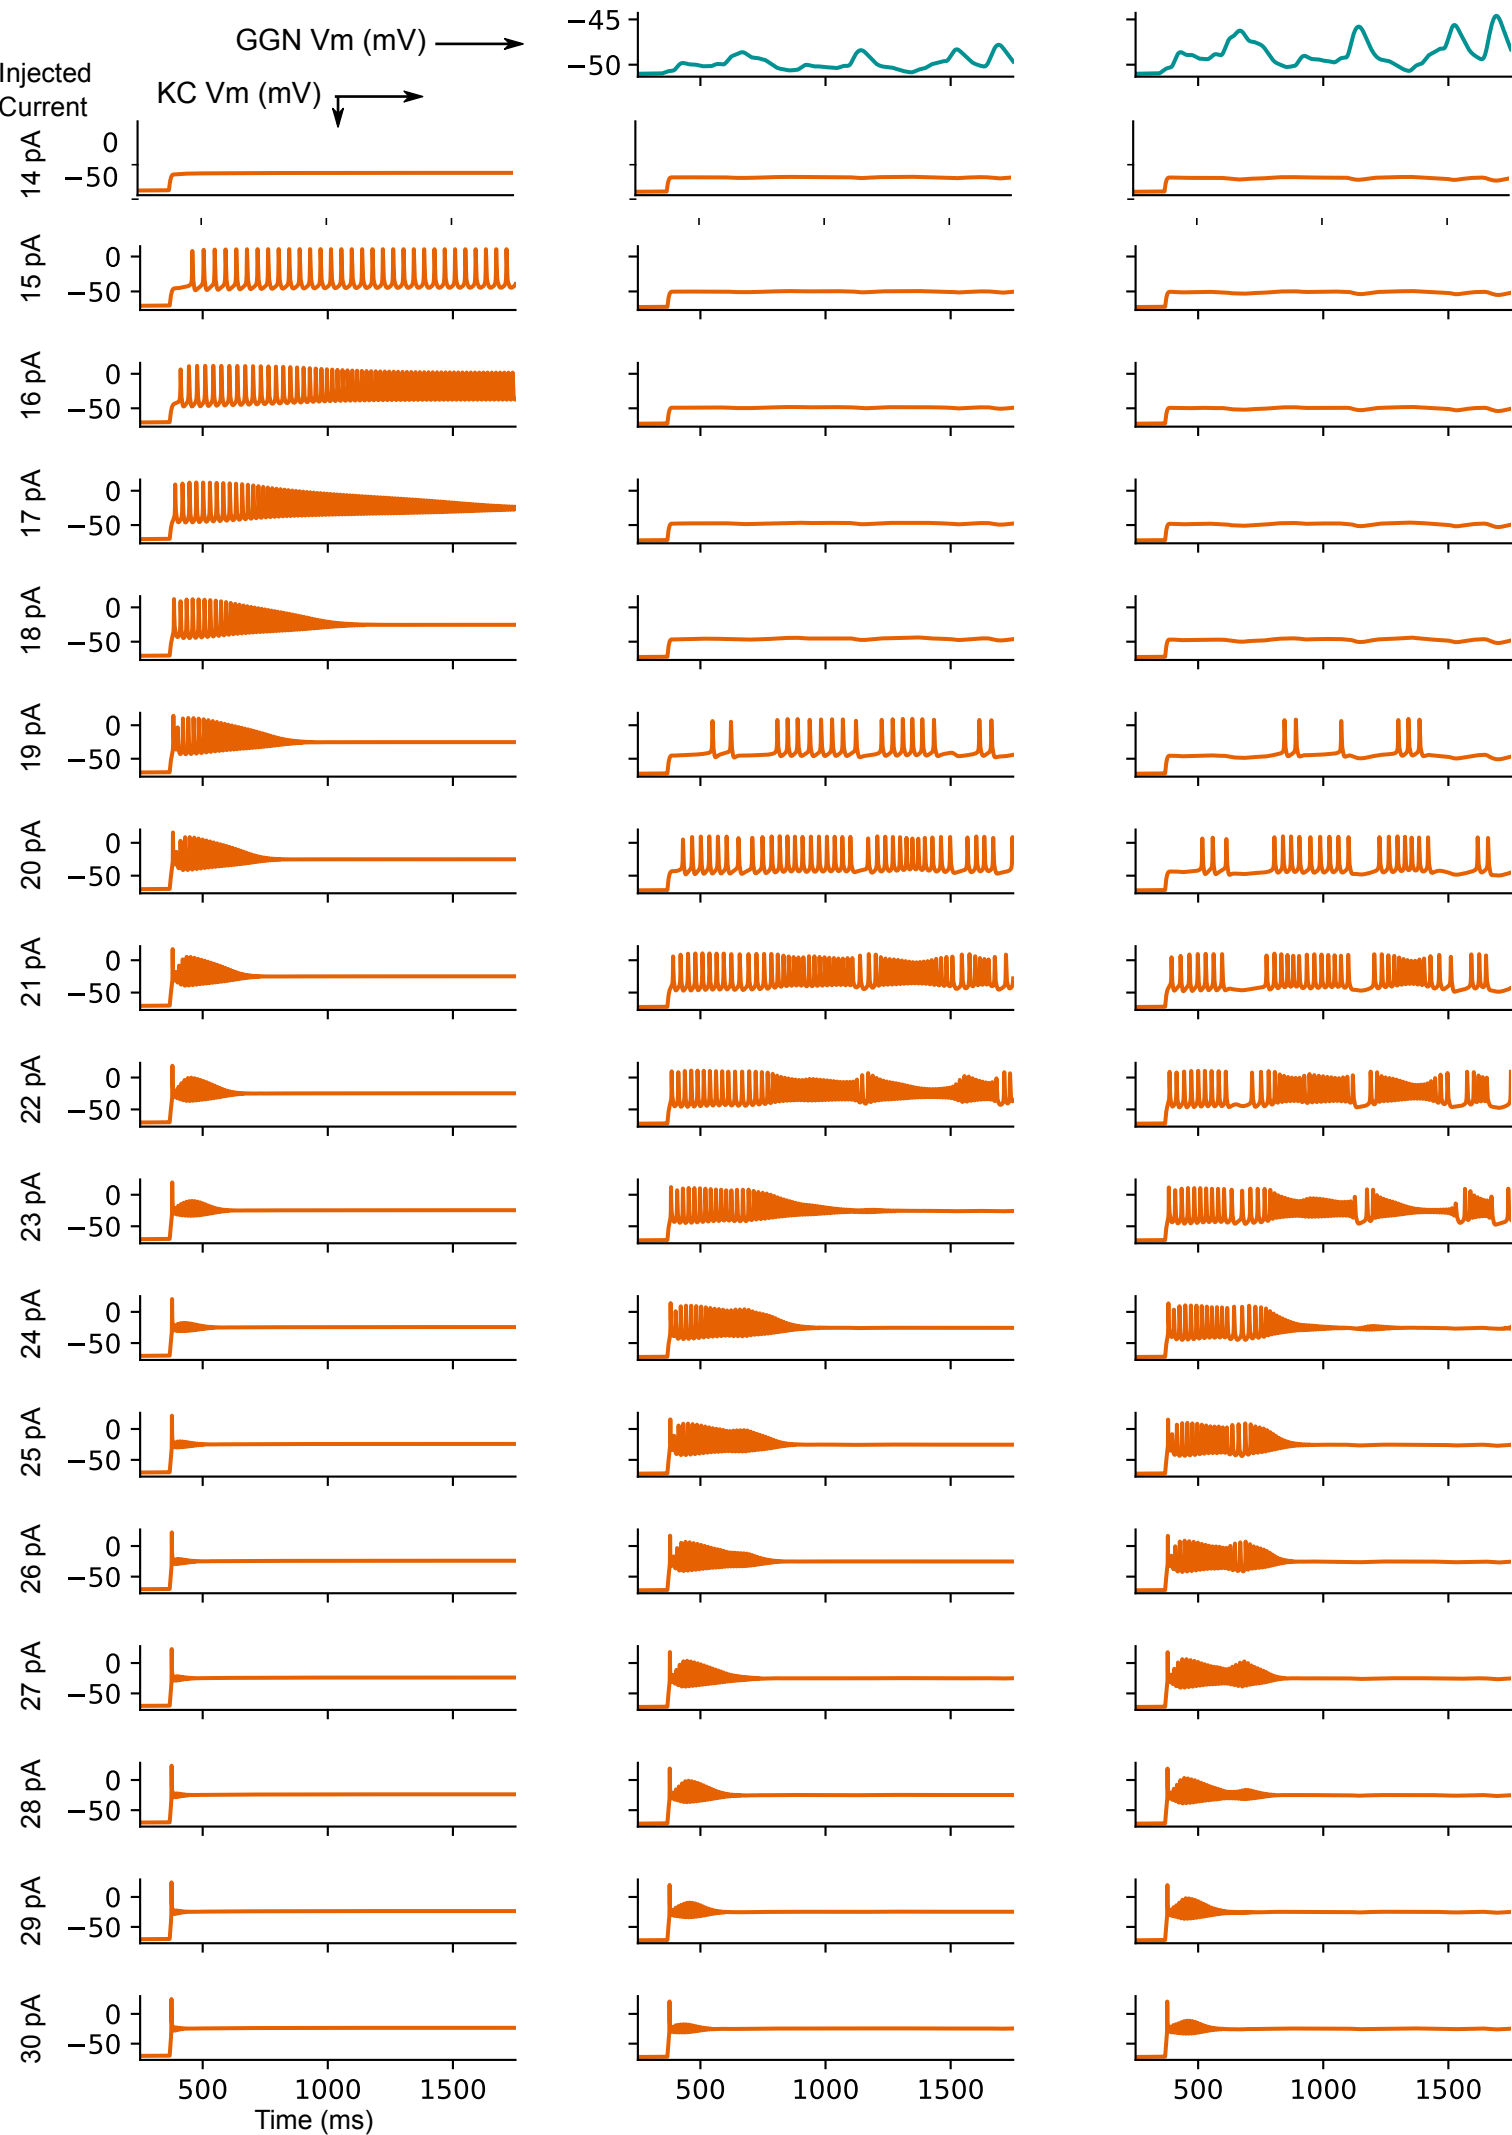

Supplement: supp [file elife_poa_e53281_Figure_3_figure_supplement_1.pdf › elife_poa_e53281_Figure_3_figure_supplement_1.pdf]

Figure 5 - figure supplement 1

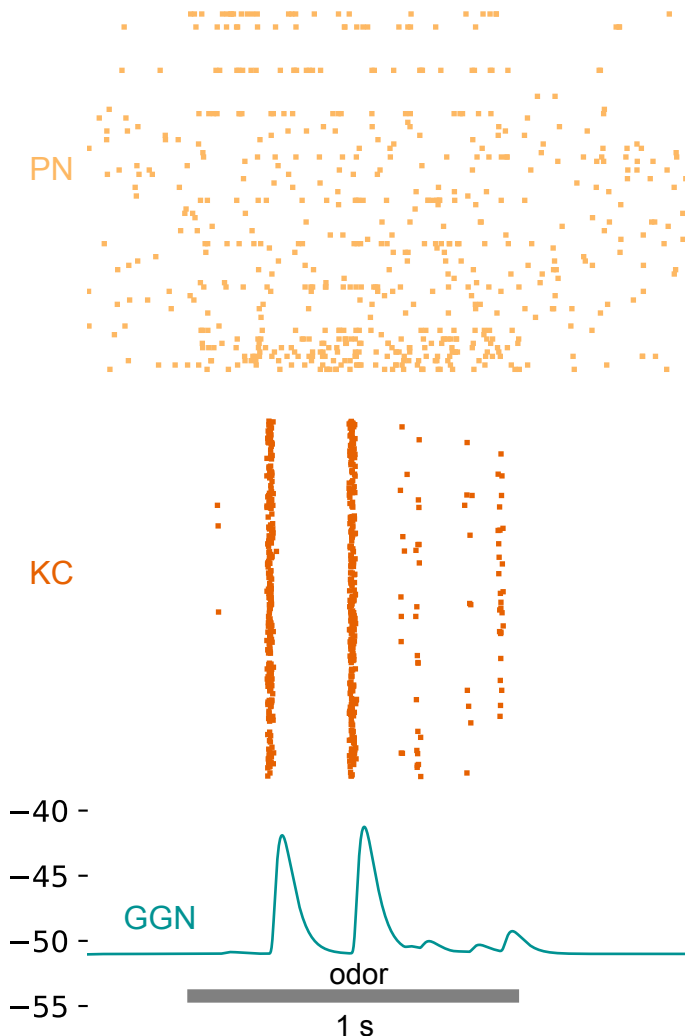

Supplement: supp [file elife_poa_e53281_Figure_5_figure_supplement_1.pdf › elife_poa_e53281_Figure_5_figure_supplement_1.pdf]

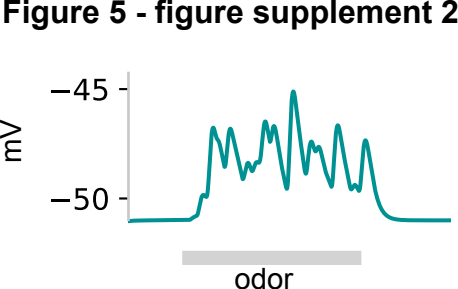

Supplement: supp [file elife_poa_e53281_Figure_5_figure_supplement_2.pdf › elife_poa_e53281_Figure_5_figure_supplement_2.pdf]

**Figure 6 - figure supplement 1**

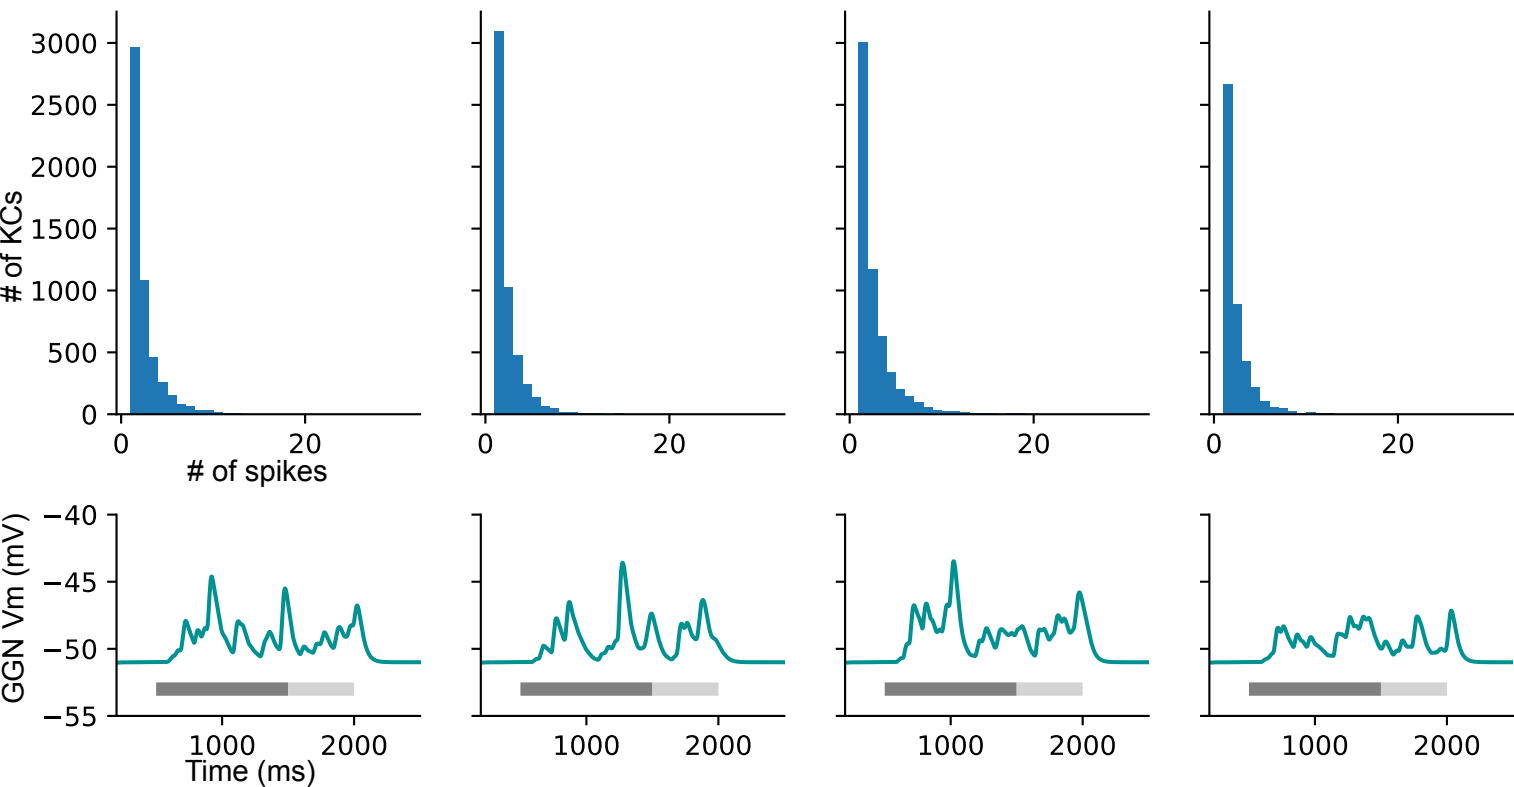

Supplement: supp [file elife_poa_e53281_Figure_6_figure_supplement_1.pdf › elife_poa_e53281_Figure_6_figure_supplement_1.pdf]

Figure 7 - figure supplement 1

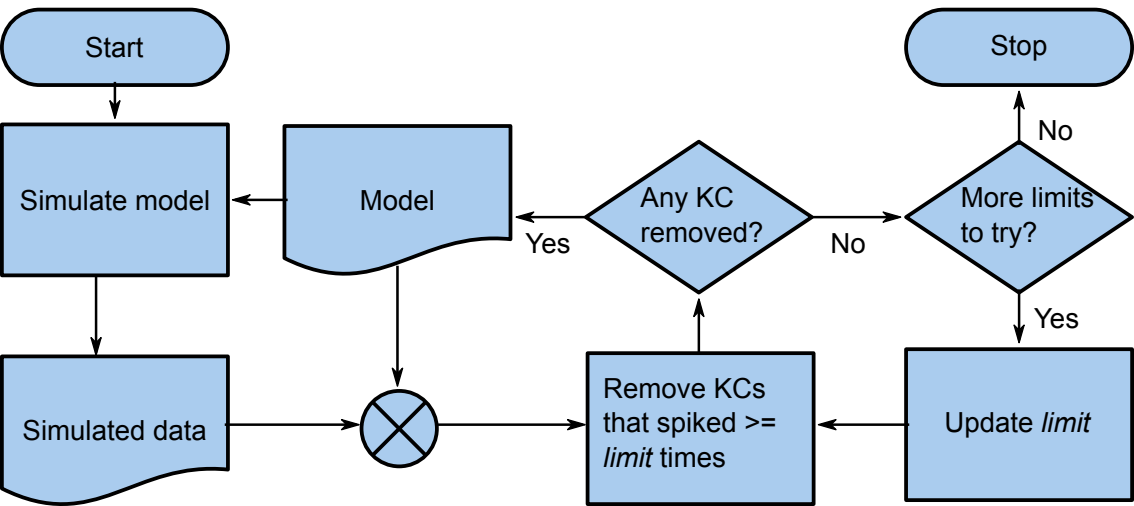

Supplement: supp [file elife_poa_e53281_Figure_7_figure_supplement_1.pdf › elife_poa_e53281_Figure_7_figure_supplement_1.pdf]
